# Supplementary material for: Pigs lacking the SRCR5 domain of CD163 protein demonstrate heritable resistance to the PRRS virus and no changes in animal performance from birth to maturity
Source: PubMed Central journal article supplement (PMC10965679; doi:10.3389/fgeed.2024.1322012), 2024-03-13
Supplement: DataSheet1.pdf [file DataSheet1.pdf]

## Supplementary Material

**Table S1.** Summary of PCR and ELISA results by zygosity in a room with pigs inoculated with PRRSV 1-4-4 L1C. Results are expressed as individual values before inoculation (day -1) and post-inoculation (days 3-21). PCR Ct values < 37 and ELISA S/P ratios  $\geq 0.4$  are positive. HOM = homozygous edited ( $CDI63^{\Delta E7/\Delta E7}$ ), HET = heterozygous ( $CDI63^{\Delta E7/+}$ ), and NULL = unedited null segregants ( $CDI63^{+/+}$ ). Darker shaded areas show positive PCR and ELISA results, and lighter shaded areas show “suspect” results that can’t be confidently confirmed positive. One pig had to be euthanized due to lameness, following the onsite veterinarian recommendation.

| PIG ID | ZYGOSITY | PCR (Ct < 37) Days Post Inoculation |           |           |           |           |           | ELISA (S/P $\geq 0.4$ ) Days Post Inoculation |      |      |      |      |      |
|--------|----------|-------------------------------------|-----------|-----------|-----------|-----------|-----------|-----------------------------------------------|------|------|------|------|------|
|        |          | 0                                   | 3         | 7         | 10        | 14        | 21        | 0                                             | 3    | 7    | 10   | 14   | 21   |
| 242    | HOM      | $\geq 37$                           | $\geq 37$ | $\geq 37$ | $\geq 37$ | $\geq 37$ | $\geq 37$ | <0.4                                          | <0.4 | <0.4 | <0.4 | <0.4 | <0.4 |
| 252    | HOM      | $\geq 37$                           | $\geq 37$ | 35.7      | $\geq 37$ | $\geq 37$ | $\geq 37$ | <0.4                                          | <0.4 | <0.4 | <0.4 | <0.4 | <0.4 |
| 261    | HOM      | $\geq 37$                           | $\geq 37$ | $\geq 37$ | $\geq 37$ | $\geq 37$ | $\geq 37$ | <0.4                                          | <0.4 | <0.4 | <0.4 | <0.4 | <0.4 |
| 280    | HOM      | $\geq 37$                           | $\geq 37$ | $\geq 37$ | $\geq 37$ | $\geq 37$ | $\geq 37$ | <0.4                                          | <0.4 | <0.4 | <0.4 | <0.4 | <0.4 |
| 296    | HOM      | $\geq 37$                           | $\geq 37$ | $\geq 37$ | $\geq 37$ | $\geq 37$ | $\geq 37$ | <0.4                                          | <0.4 | <0.4 | <0.4 | <0.4 | <0.4 |
| 325    | HOM      | $\geq 37$                           | $\geq 37$ | $\geq 37$ | $\geq 37$ | $\geq 37$ | $\geq 37$ | <0.4                                          | <0.4 | <0.4 | <0.4 | <0.4 | <0.4 |
| 346    | HOM      | $\geq 37$                           | $\geq 37$ | $\geq 37$ | $\geq 37$ | $\geq 37$ | $\geq 37$ | <0.4                                          | <0.4 | <0.4 | <0.4 | <0.4 | <0.4 |
| 369    | HOM      | $\geq 37$                           | $\geq 37$ | $\geq 37$ | $\geq 37$ | $\geq 37$ | $\geq 37$ | <0.4                                          | <0.4 | <0.4 | <0.4 | <0.4 | <0.4 |
| 379    | HOM      | $\geq 37$                           | $\geq 37$ | $\geq 37$ | $\geq 37$ | $\geq 37$ | $\geq 37$ | <0.4                                          | <0.4 | <0.4 | <0.4 | <0.4 | <0.4 |
| 385    | HOM      | $\geq 37$                           | $\geq 37$ | $\geq 37$ | $\geq 37$ | $\geq 37$ | $\geq 37$ | <0.4                                          | <0.4 | <0.4 | <0.4 | <0.4 | <0.4 |
| 401    | HOM      | $\geq 37$                           | $\geq 37$ | $\geq 37$ | $\geq 37$ | $\geq 37$ | $\geq 37$ | <0.4                                          | <0.4 | <0.4 | <0.4 | <0.4 | <0.4 |
| 436    | HOM      | $\geq 37$                           | $\geq 37$ | $\geq 37$ | $\geq 37$ | $\geq 37$ | $\geq 37$ | <0.4                                          | <0.4 | <0.4 | <0.4 | <0.4 | <0.4 |
| 441    | HOM      | $\geq 37$                           | $\geq 37$ | $\geq 37$ | $\geq 37$ | $\geq 37$ | $\geq 37$ | <0.4                                          | <0.4 | <0.4 | <0.4 | <0.4 | <0.4 |
| 266    | HET      | $\geq 37$                           | 20.1      | 17.8      | 17.3      | 16.9      | 23.8      | <0.4                                          | <0.4 | <0.4 | 0.73 | 1.07 | 1.26 |

|     |      |           |      |      |      |      |                 |      |      |      |      |      |                 |
|-----|------|-----------|------|------|------|------|-----------------|------|------|------|------|------|-----------------|
| 270 | HET  | $\geq 37$ | 18.9 | 15.6 | 16.3 | 20.7 | 24.4            | <0.4 | <0.4 | 0.47 | 1.34 | 1.19 | 1.04            |
| 322 | HET  | $\geq 37$ | 22.2 | 18.7 | 17.2 | 23.7 | 26.0            | <0.4 | <0.4 | <0.4 | 0.64 | 0.75 | 0.59            |
| 364 | HET  | $\geq 37$ | 19   | 17.1 | 19.5 | 21.5 | 22.2            | <0.4 | <0.4 | <0.4 | 0.94 | 0.88 | 0.92            |
| 375 | HET  | $\geq 37$ | 16.6 | 16.7 | 19.0 | 23.2 | 26.1            | <0.4 | <0.4 | <0.4 | 0.59 | 1.09 | 1.2             |
| 386 | HET  | $\geq 37$ | 19.6 | 18.4 | 20.4 | 24.9 | 28.1            | <0.4 | <0.4 | <0.4 | 1.2  | 1.26 | 1.4             |
| 399 | HET  | $\geq 37$ | 16.6 | 15.2 | 14.9 | 19.5 | 25.9            | <0.4 | <0.4 | <0.4 | 0.71 | 0.78 | 0.73            |
| 410 | HET  | $\geq 37$ | 14.7 | 15.3 | 17.1 | 19.6 | 30.1            | <0.4 | <0.4 | <0.4 | 0.44 | 0.62 | 0.59            |
| 326 | NULL | $\geq 37$ | 18.3 | 17.4 | 19.0 | 28.3 | 25.6            | <0.4 | <0.4 | <0.4 | 1.23 | 1.18 | 1               |
| 354 | NULL | $\geq 37$ | 20.1 | 19.7 | 19.4 | 23.0 | 24.6            | <0.4 | <0.4 | <0.4 | 1.01 | 1.28 | 1.08            |
| 278 | NULL | $\geq 37$ | 19.4 | 16.4 | 17.8 | 18.8 | 27.3            | <0.4 | <0.4 | <0.4 | 1.05 | 1.42 | 1.4             |
| 287 | NULL | $\geq 37$ | 18.9 | 16.2 | 18.3 | 20.4 | Euthan-<br>ized | <0.4 | <0.4 | <0.4 | 0.9  | 1.22 | Euthan-<br>ized |

**Table S2.** Summary of PCR and ELISA results by zygosity in a room with pigs inoculated with PRRSV NVSL97. Results are expressed as individual values before inoculation (day -1) and post-inoculation (days 3-21). PCR Ct values < 37 and ELISA S/P ratios  $\geq 0.4$  are positive. HOM = homozygous edited ( $CDI63^{\Delta E7/\Delta E7}$ ), HET = heterozygous ( $CDI63^{\Delta E7/+}$ ), and NULL = unedited null segregants ( $CDI63^{+/+}$ ). Darker shaded areas show positive PCR and ELISA results.

| Pig ID | Zygosity | PCR (Ct < 37) Days Post Inoculation |           |           |           |           |           | ELISA (S/P $\geq 0.4$ ) Days Post Inoculation |      |      |       |       |       |
|--------|----------|-------------------------------------|-----------|-----------|-----------|-----------|-----------|-----------------------------------------------|------|------|-------|-------|-------|
|        |          | 0                                   | 3         | 7         | 10        | 14        | 21        | 0                                             | 3    | 7    | 10    | 14    | 21    |
| 248    | HOM      | $\geq 37$                           | $\geq 37$ | $\geq 37$ | $\geq 37$ | $\geq 37$ | $\geq 37$ | <0.4                                          | <0.4 | <0.4 | <0.4  | <0.4  | <0.4  |
| 254    | HOM      | $\geq 37$                           | $\geq 37$ | $\geq 37$ | $\geq 37$ | $\geq 37$ | $\geq 37$ | <0.4                                          | <0.4 | <0.4 | <0.4  | <0.4  | <0.4  |
| 271    | HOM      | $\geq 37$                           | $\geq 37$ | $\geq 37$ | $\geq 37$ | $\geq 37$ | $\geq 37$ | <0.4                                          | <0.4 | <0.4 | <0.4  | <0.4  | <0.4  |
| 291    | HOM      | $\geq 37$                           | $\geq 37$ | $\geq 37$ | $\geq 37$ | $\geq 37$ | $\geq 37$ | <0.4                                          | <0.4 | <0.4 | <0.4  | <0.4  | <0.4  |
| 303    | HOM      | $\geq 37$                           | $\geq 37$ | $\geq 37$ | $\geq 37$ | $\geq 37$ | $\geq 37$ | <0.4                                          | <0.4 | <0.4 | <0.4  | <0.4  | <0.4  |
| 358    | HOM      | $\geq 37$                           | $\geq 37$ | $\geq 37$ | $\geq 37$ | $\geq 37$ | $\geq 37$ | <0.4                                          | <0.4 | <0.4 | <0.4  | <0.4  | <0.4  |
| 366    | HOM      | $\geq 37$                           | $\geq 37$ | $\geq 37$ | $\geq 37$ | $\geq 37$ | $\geq 37$ | <0.4                                          | <0.4 | <0.4 | <0.4  | <0.4  | <0.4  |
| 381    | HOM      | $\geq 37$                           | $\geq 37$ | $\geq 37$ | $\geq 37$ | $\geq 37$ | $\geq 37$ | <0.4                                          | <0.4 | <0.4 | <0.4  | <0.4  | <0.4  |
| 391    | HOM      | $\geq 37$                           | $\geq 37$ | $\geq 37$ | $\geq 37$ | $\geq 37$ | $\geq 37$ | <0.4                                          | <0.4 | <0.4 | <0.4  | <0.4  | <0.4  |
| 433    | HOM      | $\geq 37$                           | $\geq 37$ | $\geq 37$ | $\geq 37$ | $\geq 37$ | $\geq 37$ | <0.4                                          | <0.4 | <0.4 | <0.4  | <0.4  | <0.4  |
| 439    | HOM      | $\geq 37$                           | $\geq 37$ | $\geq 37$ | $\geq 37$ | $\geq 37$ | $\geq 37$ | <0.4                                          | <0.4 | <0.4 | <0.4  | <0.4  | <0.4  |
| 443    | HOM      | $\geq 37$                           | $\geq 37$ | $\geq 37$ | $\geq 37$ | $\geq 37$ | $\geq 37$ | <0.4                                          | <0.4 | <0.4 | <0.4  | <0.4  | <0.4  |
| 471    | HOM      | $\geq 37$                           | $\geq 37$ | $\geq 37$ | $\geq 37$ | $\geq 37$ | $\geq 37$ | <0.4                                          | <0.4 | <0.4 | <0.4  | <0.4  | <0.4  |
| 268    | HET      | $\geq 37$                           | 21.3      | 18.5      | 18.2      | 20.4      | 25.4      | <0.4                                          | <0.4 | <0.4 | 0.487 | 0.920 | 0.903 |
| 274    | HET      | $\geq 37$                           | 30.4      | 23.0      | 19.0      | 16.0      | 17.9      | <0.4                                          | <0.4 | <0.4 | <0.4  | 0.616 | 0.905 |
| 371    | HET      | $\geq 37$                           | 24.6      | 20.2      | 18.8      | 18.7      | 18.4      | <0.4                                          | <0.4 | <0.4 | <0.4  | <0.4  | <0.4  |
| 376    | HET      | $\geq 37$                           | 20.8      | 20.3      | 22.3      | 27.1      | 24.1      | <0.4                                          | <0.4 | <0.4 | <0.4  | 0.494 | 0.527 |

|     |      |           |           |      |      |      |      |      |      |      |       |       |       |
|-----|------|-----------|-----------|------|------|------|------|------|------|------|-------|-------|-------|
| 382 | HET  | $\geq 37$ | $\geq 37$ | 30.6 | 26.7 | 24.8 | 28.3 | <0.4 | <0.4 | <0.4 | <0.4  | 0.459 | 1.128 |
| 390 | HET  | $\geq 37$ | 23.9      | 20.3 | 17.2 | 22.6 | 18.4 | <0.4 | <0.4 | <0.4 | <0.4  | 0.913 | 0.731 |
| 403 | HET  | $\geq 37$ | 18.5      | 16.1 | 14.9 | 18.2 | 24.6 | <0.4 | <0.4 | <0.4 | <0.4  | 0.723 | 0.720 |
| 394 | NULL | $\geq 37$ | 25.7      | 21.8 | 18.1 | 20.6 | 25.7 | <0.4 | <0.4 | <0.4 | 0.597 | 1.115 | 1.075 |
| 283 | NULL | $\geq 37$ | 22.3      | 19.2 | 16.2 | 21.5 | 26.8 | <0.4 | <0.4 | <0.4 | 0.432 | 1.104 | 1.117 |
| 295 | NULL | $\geq 37$ | 21.5      | 18.6 | 16.7 | 24.4 | 26.2 | <0.4 | <0.4 | <0.4 | <0.4  | 0.760 | 0.757 |
| 351 | NULL | $\geq 37$ | 23.2      | 18.0 | 21.1 | 28.4 | 29.4 | <0.4 | <0.4 | <0.4 | 0.609 | 0.942 | 0.834 |
| 367 | NULL | $\geq 37$ | 22        | 19.5 | 18.9 | 20.5 | 26.9 | <0.4 | <0.4 | <0.4 | 0.489 | 0.802 | 0.876 |

**Table S3.** Summary of PCR and ELISA results by zygosity in a room with pigs inoculated with PRRSV SD13-15. Results are expressed as individual values before inoculation (day -1) and post-inoculation (days 3-21). PCR Ct values < 37 and ELISA S/P ratios  $\geq 0.4$  are positive. HOM = homozygous edited ( $CDI63^{\Delta E7/\Delta E7}$ ), HET = heterozygous ( $CDI63^{\Delta E7/+}$ ), and NULL = unedited null segregants ( $CDI63^{+/+}$ ). Darker shaded areas show positive PCR and ELISA results. One pig in this group was found dead.

| Pig ID | Zygosity | PCR (Ct < 37) Days Post-inoculation |           |           |           |           |           | ELISA (S/P $\geq 0.4$ ) Days Post-inoculation |      |      |      |       |       |
|--------|----------|-------------------------------------|-----------|-----------|-----------|-----------|-----------|-----------------------------------------------|------|------|------|-------|-------|
|        |          | -1                                  | 3         | 7         | 10        | 14        | 21        | 0                                             | 3    | 7    | 10   | 14    | 21    |
| 244    | HOM      | $\geq 37$                           | $\geq 37$ | $\geq 37$ | $\geq 37$ | $\geq 37$ | $\geq 37$ | <0.4                                          | <0.4 | <0.4 | <0.4 | <0.4  | <0.4  |
| 253    | HOM      | $\geq 37$                           | $\geq 37$ | $\geq 37$ | $\geq 37$ | $\geq 37$ | $\geq 37$ | <0.4                                          | <0.4 | <0.4 | <0.4 | <0.4  | <0.4  |
| 262    | HOM      | $\geq 37$                           | $\geq 37$ | $\geq 37$ | $\geq 37$ | $\geq 37$ | $\geq 37$ | <0.4                                          | <0.4 | <0.4 | <0.4 | <0.4  | <0.4  |
| 299    | HOM      | $\geq 37$                           | $\geq 37$ | $\geq 37$ | $\geq 37$ | $\geq 37$ | $\geq 37$ | <0.4                                          | <0.4 | <0.4 | <0.4 | <0.4  | <0.4  |
| 355    | HOM      | $\geq 37$                           | $\geq 37$ | $\geq 37$ | $\geq 37$ | $\geq 37$ | $\geq 37$ | <0.4                                          | <0.4 | <0.4 | <0.4 | <0.4  | <0.4  |
| 370    | HOM      | $\geq 37$                           | $\geq 37$ | $\geq 37$ | $\geq 37$ | $\geq 37$ | $\geq 37$ | <0.4                                          | <0.4 | <0.4 | <0.4 | <0.4  | <0.4  |
| 380    | HOM      | $\geq 37$                           | $\geq 37$ | $\geq 37$ | $\geq 37$ | $\geq 37$ | $\geq 37$ | <0.4                                          | <0.4 | <0.4 | <0.4 | <0.4  | <0.4  |
| 388    | HOM      | $\geq 37$                           | $\geq 37$ | $\geq 37$ | $\geq 37$ | $\geq 37$ | $\geq 37$ | <0.4                                          | <0.4 | <0.4 | <0.4 | <0.4  | <0.4  |
| 408    | HOM      | $\geq 37$                           | $\geq 37$ | $\geq 37$ | $\geq 37$ | $\geq 37$ | $\geq 37$ | <0.4                                          | <0.4 | <0.4 | <0.4 | <0.4  | <0.4  |
| 438    | HOM      | $\geq 37$                           | $\geq 37$ | $\geq 37$ | $\geq 37$ | $\geq 37$ | $\geq 37$ | <0.4                                          | <0.4 | <0.4 | <0.4 | <0.4  | <0.4  |
| 442    | HOM      | $\geq 37$                           | $\geq 37$ | $\geq 37$ | $\geq 37$ | $\geq 37$ | $\geq 37$ | <0.4                                          | <0.4 | <0.4 | <0.4 | <0.4  | <0.4  |
| 487    | HOM      | $\geq 37$                           | $\geq 37$ | $\geq 37$ | $\geq 37$ | $\geq 37$ | $\geq 37$ | <0.4                                          | <0.4 | <0.4 | <0.4 | <0.4  | <0.4  |
| 267    | HET      | $\geq 37$                           | 25.5      | 21.4      | 21.3      | 20.9      | 26.0      | <0.4                                          | <0.4 | <0.4 | <0.4 | 0.454 | 1.247 |
| 272    | HET      | $\geq 37$                           | 24.6      | 19.5      | 22.0      | 24.2      | 27.7      | <0.4                                          | <0.4 | <0.4 | <0.4 | 0.485 | 0.925 |
| 282    | HET      | $\geq 37$                           | $\geq 37$ | $\geq 37$ | 22.1      | 19.0      | 23.0      | <0.4                                          | <0.4 | <0.4 | <0.4 | <0.4  | 0.954 |
| 357    | HET      | $\geq 37$                           | $\geq 37$ | 27.7      | 19.5      | 22.5      | 26.6      | <0.4                                          | <0.4 | <0.4 | <0.4 | <0.4  | <0.4  |
| 365    | HET      | $\geq 37$                           | $\geq 37$ | $\geq 37$ | $\geq 37$ | $\geq 37$ | 19.0      | <0.4                                          | <0.4 | <0.4 | <0.4 | <0.4  | <0.4  |

|     |      |     |      |      |      |      |      |      |      |      |       |       |       |
|-----|------|-----|------|------|------|------|------|------|------|------|-------|-------|-------|
| 389 | HET  | ≥37 | 24.2 | 20.9 | 22.7 | 21.4 | 26.2 | <0.4 | <0.4 | <0.4 | 0.434 | 0.474 | 0.680 |
| 400 | HET  | ≥37 | ≥37  | ≥37  | ≥37  | ≥37  | 20.0 | <0.4 | <0.4 | <0.4 | <0.4  | <0.4  | <0.4  |
| 405 | HET  | ≥37 | 28   | 19.1 | 19.8 | 21.0 | 26.2 | <0.4 | <0.4 | <0.4 | <0.4  | 0.485 | 0.554 |
| 288 | NULL | ≥37 | ≥37  | ≥37  | 30.3 | 22.2 | Dead | <0.4 | <0.4 | <0.4 | <0.4  | <0.4  | Dead  |
| 338 | NULL | ≥37 | ≥37  | ≥37  | ≥37  | 29.1 | 21.9 | <0.4 | <0.4 | <0.4 | <0.4  | <0.4  | 0.411 |
| 359 | NULL | ≥37 | ≥37  | ≥37  | ≥37  | ≥37  | 20.7 | <0.4 | <0.4 | <0.4 | <0.4  | <0.4  | <0.4  |
| 377 | NULL | ≥37 | ≥37  | ≥37  | 27.5 | 22.1 | 25.1 | <0.4 | <0.4 | <0.4 | <0.4  | <0.4  | 1.353 |
| 281 | NULL | ≥37 | ≥37  | ≥37  | ≥37  | 23.5 | 22.3 | <0.4 | <0.4 | <0.4 | <0.4  | <0.4  | <0.4  |

**Table S4.** Summary of PCR and ELISA results by zygosity in a room with pigs inoculated with PRRSV 1-8-4 L1H. Results are expressed as individual values before inoculation (day -1) and post-inoculation (days 3-21). PCR Ct values < 37 and ELISA S/P ratios  $\geq 0.4$  are positive. HOM = homozygous edited ( $CDI63^{\Delta E7/\Delta E7}$ ), HET = heterozygous ( $CDI63^{\Delta E7/+}$ ), and NULL = unedited null segregants ( $CDI63^{+/+}$ ). Darker shaded areas show positive PCR and ELISA results, and lighter shaded areas show “suspect” results that can’t be confidently confirmed positive.

| Pig ID | Zygosity | PCR (Ct < 37) Days Post-inoculation |           |           |           |           |           | ELISA (S/P $\geq 0.4$ ) Days Post-inoculation |      |      |       |       |       |
|--------|----------|-------------------------------------|-----------|-----------|-----------|-----------|-----------|-----------------------------------------------|------|------|-------|-------|-------|
|        |          | -1                                  | 3         | 7         | 10        | 14        | 21        | 0                                             | 3    | 7    | 10    | 14    | 21    |
| 841    | HOM      | $\geq 37$                           | $\geq 37$ | $\geq 37$ | $\geq 37$ | $\geq 37$ | $\geq 37$ | <0.4                                          | <0.4 | <0.4 | <0.4  | <0.4  | <0.4  |
| 835    | HOM      | $\geq 37$                           | $\geq 37$ | 35.4      | $\geq 37$ | $\geq 37$ | $\geq 37$ | <0.4                                          | <0.4 | <0.4 | <0.4  | <0.4  | <0.4  |
| 866    | HOM      | $\geq 37$                           | $\geq 37$ | $\geq 37$ | $\geq 37$ | $\geq 37$ | $\geq 37$ | <0.4                                          | <0.4 | <0.4 | <0.4  | <0.4  | <0.4  |
| 883    | HOM      | $\geq 37$                           | $\geq 37$ | $\geq 37$ | $\geq 37$ | $\geq 37$ | $\geq 37$ | <0.4                                          | <0.4 | <0.4 | <0.4  | <0.4  | <0.4  |
| 887    | HOM      | $\geq 37$                           | $\geq 37$ | $\geq 37$ | $\geq 37$ | $\geq 37$ | $\geq 37$ | <0.4                                          | <0.4 | <0.4 | <0.4  | <0.4  | <0.4  |
| 815    | NULL     | $\geq 37$                           | 18.4      | 15.3      | 17.5      | 19.2      | 22.2      | <0.4                                          | <0.4 | <0.4 | 0.525 | 0.665 | 0.737 |
| 817    | NULL     | $\geq 37$                           | 18.4      | 16.2      | 19.3      | 17.9      | 24.4      | <0.4                                          | <0.4 | <0.4 | 1.177 | 1.123 | 1.183 |
| 711    | NULL     | $\geq 37$                           | 22        | 18.3      | 17.5      | 17.7      | 24.1      | <0.4                                          | <0.4 | <0.4 | <0.4  | 0.55  | 0.55  |
| 865    | NULL     | $\geq 37$                           | 19.3      | 14.8      | 18.7      | 20.9      | 24.2      | <0.4                                          | <0.4 | <0.4 | 0.87  | 0.622 | 0.765 |
| 906    | NULL     | $\geq 37$                           | 16.1      | 14        | 18.7      | 18.1      | 22.5      | <0.4                                          | <0.4 | <0.4 | 0.853 | 0.661 | 1.138 |

**Table S5.** Summary of PCR and ELISA results by zygosity in a room with pigs inoculated with PRRSV 1-7-4 L1A. Results are expressed as individual values before inoculation (day -1) and post-inoculation (days 3-21). PCR Ct values < 37 and ELISA S/P ratios  $\geq 0.4$  are positive. HOM = homozygous edited ( $CDI63^{\Delta E7/\Delta E7}$ ), HET = heterozygous ( $CDI63^{\Delta E7/+}$ ), and NULL = unedited null segregants ( $CDI63^{+/+}$ ). Darker shaded areas show positive PCR and ELISA results.

| Pig ID | Zygosity | PCR (Ct < 37) Days Post-inoculation |           |           |           |           |           | ELISA (S/P $\geq 0.4$ ) Days Post-inoculation |      |       |       |       |       |
|--------|----------|-------------------------------------|-----------|-----------|-----------|-----------|-----------|-----------------------------------------------|------|-------|-------|-------|-------|
|        |          | -1                                  | 3         | 7         | 10        | 14        | 21        | 0                                             | 3    | 7     | 10    | 14    | 21    |
| 836    | HOM      | $\geq 37$                           | $\geq 37$ | $\geq 37$ | $\geq 37$ | $\geq 37$ | $\geq 37$ | <0.4                                          | <0.4 | <0.4  | <0.4  | <0.4  | <0.4  |
| 770    | HOM      | $\geq 37$                           | $\geq 37$ | $\geq 37$ | $\geq 37$ | $\geq 37$ | $\geq 37$ | <0.4                                          | <0.4 | <0.4  | <0.4  | <0.4  | <0.4  |
| 862    | HOM      | $\geq 37$                           | $\geq 37$ | $\geq 37$ | $\geq 37$ | $\geq 37$ | $\geq 37$ | <0.4                                          | <0.4 | <0.4  | <0.4  | <0.4  | <0.4  |
| 890    | HOM      | $\geq 37$                           | $\geq 37$ | $\geq 37$ | $\geq 37$ | $\geq 37$ | $\geq 37$ | <0.4                                          | <0.4 | <0.4  | <0.4  | <0.4  | <0.4  |
| 892    | HOM      | $\geq 37$                           | $\geq 37$ | $\geq 37$ | $\geq 37$ | $\geq 37$ | $\geq 37$ | <0.4                                          | <0.4 | <0.4  | <0.4  | <0.4  | <0.4  |
| 828    | NULL     | $\geq 37$                           | 15.8      | 12.3      | 21.5      | 16.8      | 29.2      | <0.4                                          | <0.4 | <0.4  | 0.462 | 0.498 | 0.63  |
| 717    | NULL     | $\geq 37$                           | 16        | 15.4      | 16.6      | 21        | 26.3      | <0.4                                          | <0.4 | <0.4  | 0.505 | <0.4  | 0.627 |
| 710    | NULL     | $\geq 37$                           | 16        | 16.1      | 17.3      | 20.5      | 27.5      | <0.4                                          | <0.4 | <0.4  | <0.4  | <0.4  | <0.4  |
| 864    | NULL     | $\geq 37$                           | 18.1      | 14.1      | 20.2      | 17.5      | 22.9      | <0.4                                          | <0.4 | 0.652 | 1.358 | 0.998 | 1.077 |
| 745    | NULL     | $\geq 37$                           | 16.5      | 16.4      | 18        | 17.6      | 25.9      | <0.4                                          | <0.4 | <0.4  | 0.517 | <0.4  | <0.4  |



**Table S6.** Summary of PCR and ELISA results by zygosity in a room with pigs inoculated with PRRSV 1-4-2 L1E. Results are expressed as individual values before inoculation (day -1) and post-inoculation (days 3-21). PCR Ct values < 37 and ELISA S/P ratios  $\geq 0.4$  are positive. HOM = homozygous edited ( $CDI63^{\Delta E7/\Delta E7}$ ), HET = heterozygous ( $CDI63^{\Delta E7/+}$ ), and NULL = unedited null segregants ( $CDI63^{+/+}$ ). Darker shaded areas show positive PCR and ELISA results.

| Pig ID | Zygosity | PCR (Ct < 37) Days Post-inoculation |           |           |           |           |           | ELISA (S/P $\geq 0.4$ ) Days Post-inoculation |      |      |       |       |       |
|--------|----------|-------------------------------------|-----------|-----------|-----------|-----------|-----------|-----------------------------------------------|------|------|-------|-------|-------|
|        |          | -1                                  | 3         | 7         | 10        | 14        | 21        | 0                                             | 3    | 7    | 10    | 14    | 21    |
| 842    | HOM      | $\geq 37$                           | $\geq 37$ | $\geq 37$ | $\geq 37$ | $\geq 37$ | $\geq 37$ | <0.4                                          | <0.4 | <0.4 | <0.4  | <0.4  | <0.4  |
| 773    | HOM      | $\geq 37$                           | $\geq 37$ | $\geq 37$ | $\geq 37$ | $\geq 37$ | $\geq 37$ | <0.4                                          | <0.4 | <0.4 | <0.4  | <0.4  | <0.4  |
| 858    | HOM      | $\geq 37$                           | $\geq 37$ | $\geq 37$ | $\geq 37$ | $\geq 37$ | $\geq 37$ | <0.4                                          | <0.4 | <0.4 | <0.4  | <0.4  | <0.4  |
| 891    | HOM      | $\geq 37$                           | $\geq 37$ | $\geq 37$ | $\geq 37$ | $\geq 37$ | $\geq 37$ | <0.4                                          | <0.4 | <0.4 | <0.4  | <0.4  | <0.4  |
| 893    | HOM      | $\geq 37$                           | $\geq 37$ | $\geq 37$ | $\geq 37$ | $\geq 37$ | $\geq 37$ | <0.4                                          | <0.4 | <0.4 | <0.4  | <0.4  | <0.4  |
| 824    | NULL     | $\geq 37$                           | 26.5      | 20.3      | 21.5      | 23        | 27        | <0.4                                          | <0.4 | <0.4 | 0.418 | 0.495 | <0.4  |
| 716    | NULL     | $\geq 37$                           | 28.1      | 20.8      | 20.9      | 20.5      | 26.4      | <0.4                                          | <0.4 | <0.4 | 0.552 | 1.794 | 1.717 |
| 870    | NULL     | $\geq 37$                           | 25.1      | 22.1      | 27.5      | 24.4      | 28.9      | <0.4                                          | <0.4 | <0.4 | 1.328 | 1.432 | 1.539 |
| 861    | NULL     | $\geq 37$                           | 27.8      | 21.2      | 26.7      | 26.5      | 29.1      | <0.4                                          | <0.4 | <0.4 | 1.095 | 1.164 | 1.224 |
| 744    | NULL     | $\geq 37$                           | 23.6      | 17.9      | 20.9      | 22        | 25.4      | <0.4                                          | <0.4 | <0.4 | 0.605 | 1.025 | 1.005 |

**Table S7.** Depression and respiratory score of 1 by zygosity and expressed as total numbers and as a percentage. The number of observations by zygosity represents the sum of daily observations between challenge and 21 days post inoculation. Only scores of 0 and 1 were observed throughout the study after PRRSV inoculation, while scores of 2 and 3 were not observed. HOM = homozygous edited ( $CDI63^{\Delta E7/\Delta E7}$ ), HET = heterozygous ( $CDI63^{\Delta E7/+}$ ), and NULL = unedited null segregants ( $CDI63^{+/+}$ ).

| Isolate   | Zygosity<br>(n=number) | Number of Observations with<br>Depression<br>Assessment Score of 1<br>(percentage) | Number of Observations with<br>Respiratory<br>Assessment Score of 1<br>(percentage) |
|-----------|------------------------|------------------------------------------------------------------------------------|-------------------------------------------------------------------------------------|
| 1-4-4 L1C | HOMO (n=286)           | 3 (1.04 %)                                                                         | 7 (2.45 %)                                                                          |
|           | HET (n=176)            | 24 (13.63 %)                                                                       | 23 (13.08 %)                                                                        |
|           | NULL (n=81)            | 27 (33.33 %)                                                                       | 14 (17.28 %)                                                                        |
| NVSL97    | HOMO (n=286)           | 6 (2.09 %)                                                                         | 24 (8.39 %)                                                                         |
|           | HET (n=154)            | 10 (6.49 %)                                                                        | 15 (9.74 %)                                                                         |
|           | NULL (n=110)           | 7 (6.36 %)                                                                         | 6 (5.45 %)                                                                          |
| SD13-15   | HOMO (n=264)           | 1 (0.37 %)                                                                         | 8 (2.99 %)                                                                          |
|           | HET (n= 176)           | 3 (1.70 %)                                                                         | 8 (4.59 %)                                                                          |
|           | NULL (n=103)           | 2 (1.94 %)                                                                         | 7 (6.79 %)                                                                          |

**Figure S1 (A-C).** Daily rectal temperatures from day 0 (pre-inoculation) to 21 days post-inoculation with PRRSV isolates: **(A)** 1-4-4 L1C, **(B)** NVSL97, and **(C)** SD13-15. The results are shown as average temperatures by zygosity. All temperatures were taken at the same time (am). A blue line separates temperatures higher or lower than 40°C. There were 13 homozygous pigs and 12 controls (eight heterozygous and four nulls) inoculated with 1-4-4 L1C; 13 homozygous and 12 controls (7 heterozygous and five nulls) inoculated with NVSL97; and 13 homozygous pigs and 13 controls (8 heterozygous and five null pigs) inoculated with SD13-15. The tables below the figures show differences between zygositys, where different superscripts by day represent significant statistical differences (highlighted in shaded boxes).

**A.**

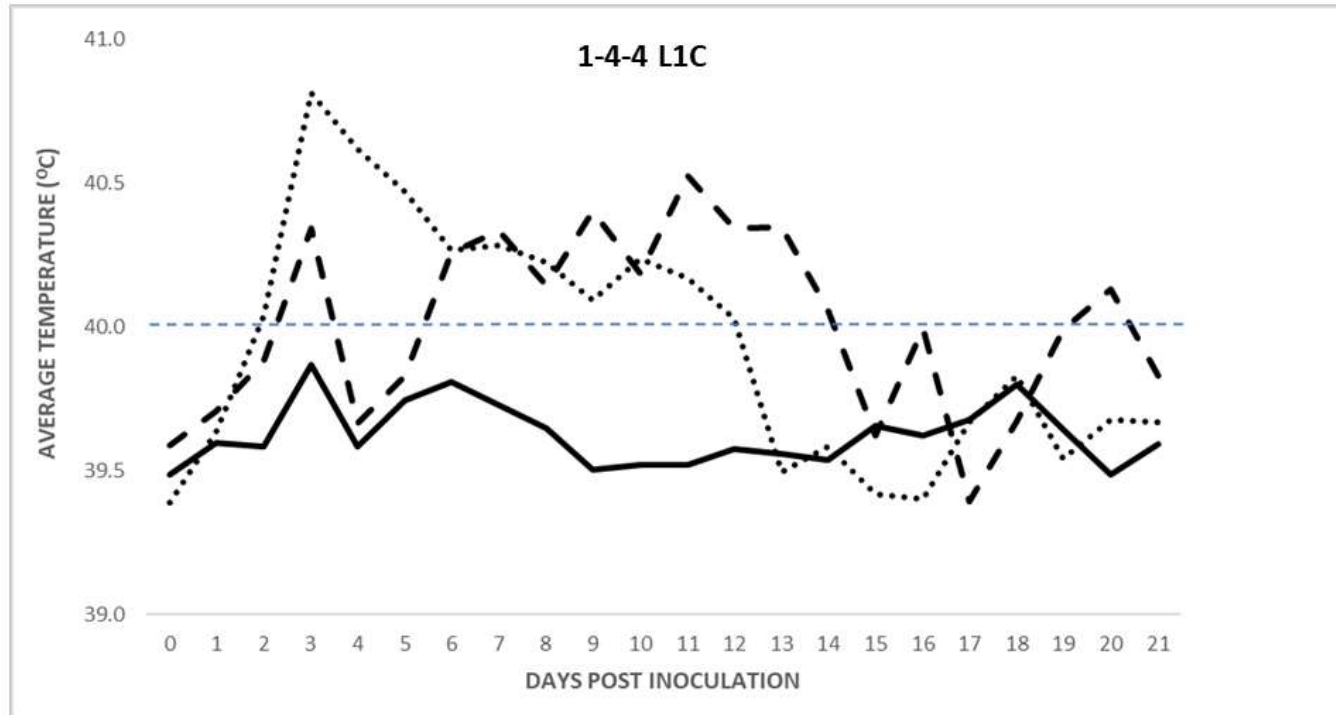

|      | 0                 | 1                 | 2                 | 3                  | 4                 | 5                  | 6                 | 7                  | 8                  | 9                  | 10                 | 11                | 12                 | 13                 | 14                | 15                | 16                | 17                | 18                | 19                | 20                 | 21                |
|------|-------------------|-------------------|-------------------|--------------------|-------------------|--------------------|-------------------|--------------------|--------------------|--------------------|--------------------|-------------------|--------------------|--------------------|-------------------|-------------------|-------------------|-------------------|-------------------|-------------------|--------------------|-------------------|
| HOM  | 39.5 <sup>a</sup> | 39.6 <sup>a</sup> | 39.6 <sup>a</sup> | 39.9 <sup>a</sup>  | 39.6 <sup>a</sup> | 39.7 <sup>a</sup>  | 39.8 <sup>a</sup> | 39.7 <sup>a</sup>  | 39.6 <sup>a</sup>  | 39.5 <sup>a</sup>  | 39.5 <sup>a</sup>  | 39.5 <sup>a</sup> | 39.6 <sup>a</sup>  | 39.6 <sup>a</sup>  | 39.5 <sup>a</sup> | 39.7 <sup>a</sup> | 39.6 <sup>a</sup> | 39.7 <sup>a</sup> | 39.8 <sup>a</sup> | 39.6 <sup>a</sup> | 39.5 <sup>a</sup>  | 39.6 <sup>a</sup> |
| NULL | 39.6 <sup>a</sup> | 39.7 <sup>a</sup> | 39.9 <sup>a</sup> | 40.3 <sup>ab</sup> | 39.7 <sup>a</sup> | 39.8 <sup>bc</sup> | 40.3 <sup>a</sup> | 40.3 <sup>bc</sup> | 40.1 <sup>ab</sup> | 40.4 <sup>bc</sup> | 40.2 <sup>bc</sup> | 40.5 <sup>a</sup> | 40.3 <sup>bc</sup> | 40.3 <sup>b</sup>  | 40.1 <sup>a</sup> | 39.6 <sup>a</sup> | 40.0 <sup>a</sup> | 39.4 <sup>a</sup> | 39.7 <sup>a</sup> | 40.0 <sup>a</sup> | 40.1 <sup>b</sup>  | 39.8 <sup>a</sup> |
| HET  | 39.4 <sup>a</sup> | 39.6 <sup>a</sup> | 40.0 <sup>a</sup> | 40.8 <sup>b</sup>  | 40.6 <sup>b</sup> | 40.5 <sup>b</sup>  | 40.3 <sup>a</sup> | 40.3 <sup>b</sup>  | 40.2 <sup>b</sup>  | 40.1 <sup>c</sup>  | 40.2 <sup>c</sup>  | 40.2 <sup>a</sup> | 40.0 <sup>b</sup>  | 39.5 <sup>bc</sup> | 39.6 <sup>a</sup> | 39.4 <sup>a</sup> | 39.4 <sup>a</sup> | 39.7 <sup>a</sup> | 39.8 <sup>a</sup> | 39.5 <sup>a</sup> | 39.7 <sup>ab</sup> | 39.7 <sup>a</sup> |

B.

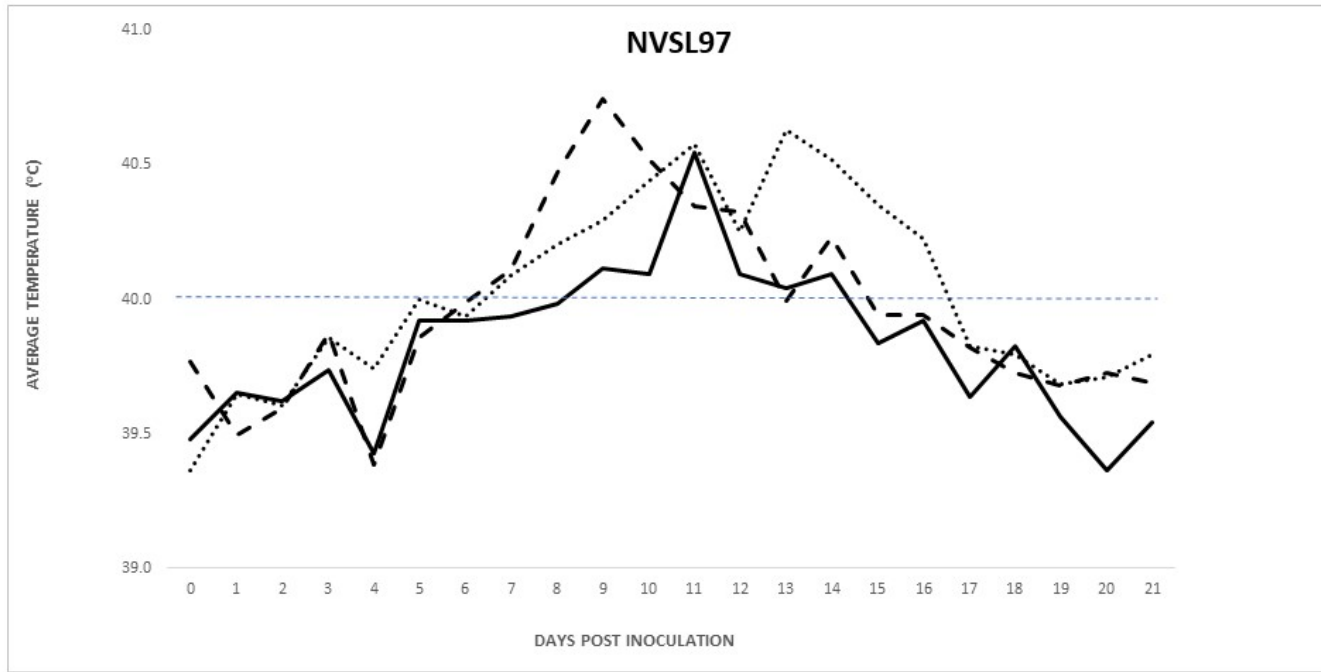

|      | 0                 | 1                 | 2                 | 3                 | 4                 | 5                 | 6                 | 7                 | 8                 | 9                 | 10                 | 11                | 12                | 13                | 14                | 15                 | 16                | 17                | 18                | 19                | 20                 | 21                |
|------|-------------------|-------------------|-------------------|-------------------|-------------------|-------------------|-------------------|-------------------|-------------------|-------------------|--------------------|-------------------|-------------------|-------------------|-------------------|--------------------|-------------------|-------------------|-------------------|-------------------|--------------------|-------------------|
| HOM  | 39.3 <sup>a</sup> | 39.6 <sup>a</sup> | 39.6 <sup>a</sup> | 39.7 <sup>a</sup> | 39.7 <sup>a</sup> | 39.7 <sup>a</sup> | 39.8 <sup>a</sup> | 39.9 <sup>a</sup> | 39.2 <sup>a</sup> | 39.9 <sup>a</sup> | 39.9 <sup>a</sup>  | 39.7 <sup>a</sup> | 39.6 <sup>a</sup> | 39.5 <sup>a</sup> | 39.6 <sup>a</sup> | 39.7 <sup>a</sup>  | 39.7 <sup>a</sup> | 39.4 <sup>a</sup> | 39.5 <sup>a</sup> | 39.4 <sup>a</sup> | 39.3 <sup>a</sup>  | 39.5 <sup>a</sup> |
| NULL | 39.5 <sup>a</sup> | 39.7 <sup>a</sup> | 39.6 <sup>a</sup> | 39.8 <sup>a</sup> | 39.8 <sup>a</sup> | 39.8 <sup>a</sup> | 40.0 <sup>a</sup> | 39.8 <sup>a</sup> | 39.6 <sup>a</sup> | 39.6 <sup>a</sup> | 39.8 <sup>b</sup>  | 39.9 <sup>a</sup> | 39.5 <sup>a</sup> | 39.7 <sup>a</sup> | 39.5 <sup>a</sup> | 39.5 <sup>ab</sup> | 39.3 <sup>a</sup> | 39.9 <sup>a</sup> | 39.5 <sup>a</sup> | 39.6 <sup>a</sup> | 39.5 <sup>bc</sup> | 39.6 <sup>a</sup> |
| HET  | 39.5 <sup>a</sup> | 39.8 <sup>a</sup> | 39.5 <sup>a</sup> | 39.6 <sup>a</sup> | 39.7 <sup>a</sup> | 39.6 <sup>a</sup> | 39.9 <sup>a</sup> | 39.7 <sup>a</sup> | 39.5 <sup>a</sup> | 39.6 <sup>a</sup> | 39.9 <sup>ab</sup> | 40.0 <sup>a</sup> | 39.9 <sup>a</sup> | 39.7 <sup>a</sup> | 39.6 <sup>a</sup> | 39.8 <sup>b</sup>  | 39.6 <sup>a</sup> | 39.7 <sup>a</sup> | 39.4 <sup>a</sup> | 39.7 <sup>a</sup> | 39.6 <sup>b</sup>  | 39.7 <sup>a</sup> |

C.

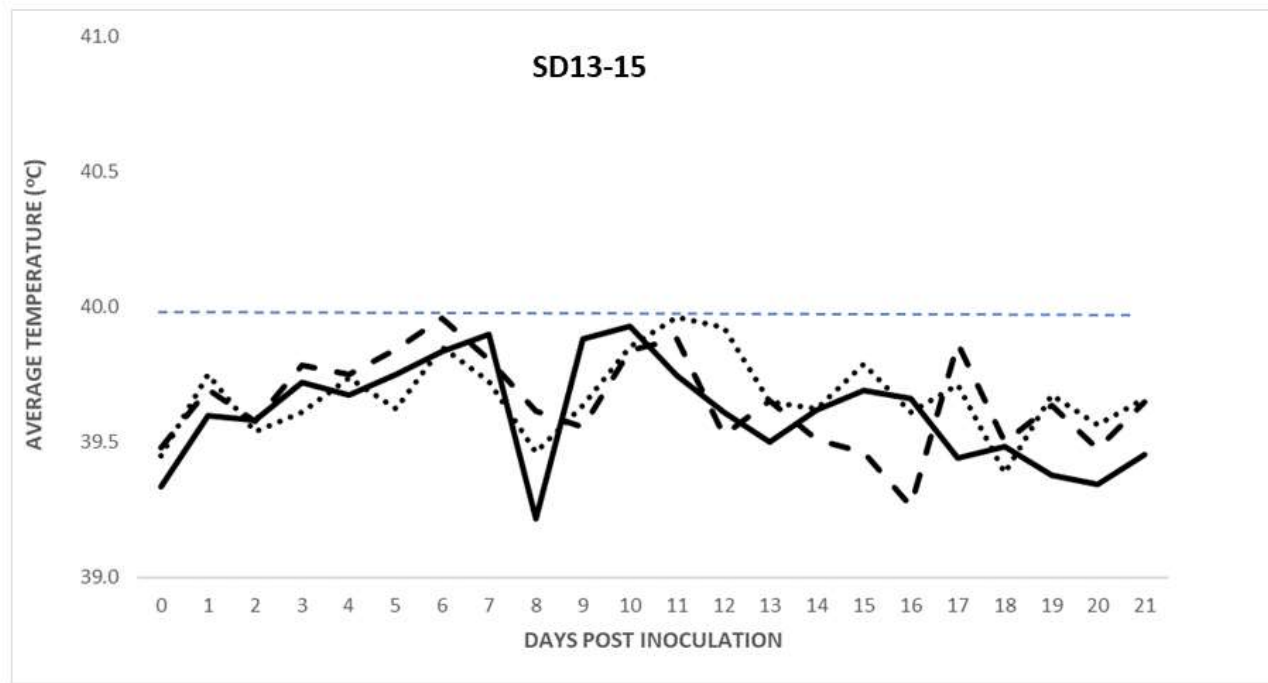

|      | 0                 | 1                 | 2                 | 3                 | 4                 | 5                 | 6                 | 7                 | 8                 | 9                 | 10                | 11                | 12                | 13                | 14                | 15                | 16                | 17                 | 18                | 19                | 20                | 21                |
|------|-------------------|-------------------|-------------------|-------------------|-------------------|-------------------|-------------------|-------------------|-------------------|-------------------|-------------------|-------------------|-------------------|-------------------|-------------------|-------------------|-------------------|--------------------|-------------------|-------------------|-------------------|-------------------|
| HOM  | 39.3 <sup>a</sup> | 39.6 <sup>a</sup> | 39.6 <sup>a</sup> | 39.7 <sup>a</sup> | 39.7 <sup>a</sup> | 39.7 <sup>a</sup> | 39.8 <sup>a</sup> | 39.9 <sup>a</sup> | 39.2 <sup>a</sup> | 39.9 <sup>a</sup> | 39.9 <sup>a</sup> | 39.7 <sup>a</sup> | 39.6 <sup>a</sup> | 39.5 <sup>a</sup> | 39.6 <sup>a</sup> | 39.7 <sup>a</sup> | 39.7 <sup>a</sup> | 39.4 <sup>a</sup>  | 39.5 <sup>a</sup> | 39.4 <sup>a</sup> | 39.3 <sup>a</sup> | 39.5 <sup>a</sup> |
| NULL | 39.5 <sup>a</sup> | 39.7 <sup>a</sup> | 39.6 <sup>a</sup> | 39.8 <sup>a</sup> | 39.8 <sup>a</sup> | 39.8 <sup>a</sup> | 40.0 <sup>a</sup> | 39.8 <sup>a</sup> | 39.6 <sup>a</sup> | 39.6 <sup>a</sup> | 39.8 <sup>a</sup> | 39.9 <sup>a</sup> | 39.5 <sup>a</sup> | 39.7 <sup>a</sup> | 39.5 <sup>a</sup> | 39.5 <sup>a</sup> | 39.3 <sup>a</sup> | 39.9 <sup>b</sup>  | 39.5 <sup>a</sup> | 39.6 <sup>a</sup> | 39.5 <sup>a</sup> | 39.6 <sup>a</sup> |
| HET  | 39.5 <sup>a</sup> | 39.8 <sup>a</sup> | 39.5 <sup>a</sup> | 39.6 <sup>a</sup> | 39.7 <sup>a</sup> | 39.6 <sup>a</sup> | 39.9 <sup>a</sup> | 39.7 <sup>a</sup> | 39.5 <sup>a</sup> | 39.6 <sup>a</sup> | 39.9 <sup>a</sup> | 40.0 <sup>a</sup> | 39.9 <sup>a</sup> | 39.7 <sup>a</sup> | 39.6 <sup>a</sup> | 39.8 <sup>a</sup> | 39.6 <sup>a</sup> | 39.7 <sup>ab</sup> | 39.4 <sup>a</sup> | 39.7 <sup>a</sup> | 39.6 <sup>a</sup> | 39.7 <sup>a</sup> |
